# Supplementary material for: CRISPR/Cas9 mediated mutagenesis of MORE AXILLARY GROWTH 1 in tomato confers resistance to root parasitic weed Phelipanche aegyptiaca
Source: PubMed Central journal article supplement (PMC7887253; doi:10.1038/s41598-021-82897-8), 2021-02-16
Supplement: 41598_2021_82897_MOESM1_ESM.pdf [file 41598_2021_82897_MOESM1_ESM.pdf]

Supplementary Information:

**CRISPR/Cas9 mediated mutagenesis of *MORE AXILLARY GROWTH 1* in tomato confers resistance to root parasitic weed *Phelipanche aegyptiaca***

Vinay Kumar Bari<sup>1, 2\*</sup>, Jackline Abu Nassar<sup>1</sup>, Radi Aly<sup>1\*</sup>

<sup>1</sup>Department of Plant Pathology and Weed Research, Newe Ya'ar Research Center, Agricultural Research Organization (ARO), Ramat Yishay, Israel.

<sup>2</sup>Current Address: Department of Biochemistry, School of Basic Sciences, Central University of Punjab, VPO-Ghudda, Bathinda, India.

\*Correspondence

Vinay Kumar Bari: [vinay.bari@cup.edu.in](mailto:vinay.bari@cup.edu.in)

Radi Aly: [radi@volcani.agri.gov.il](mailto:radi@volcani.agri.gov.il)

**MAX1-sgRNA target**

CAAGTTCTCAAAGAATCCCGGG

**Off target** (4 mismatch)

AAAATTTTTCAAAGAATACCTGG

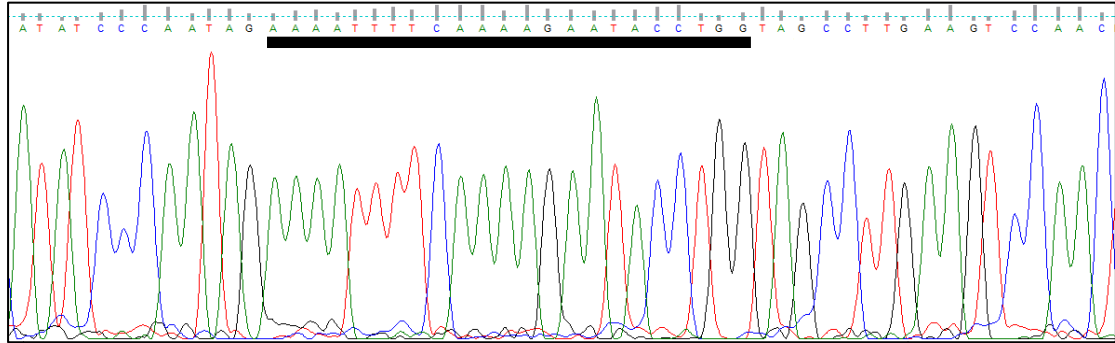

**Fig. S1.** PCR product DNA sequencing chromatogram of potential off-target of the MAX1-sgRNA. No mutation at off-target site detected in the genome of MAX1-Cas9 edited homozygous lines. Region highlighted in black bar correspond to off target sites.

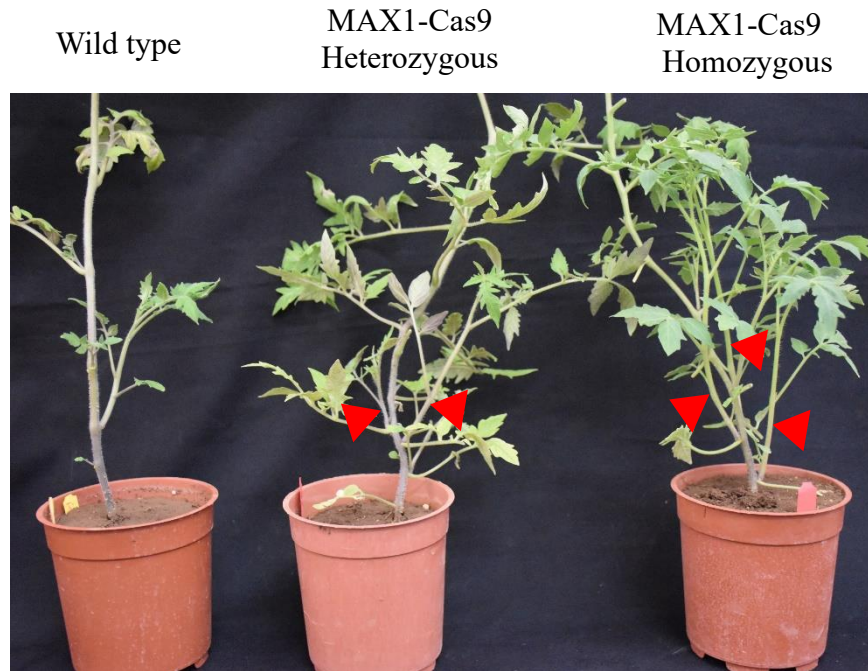

**Fig. S2.** Characteristic axillary bud outgrowth phenotype of 1-month-old MAX1-Cas9 heterozygous and homozygous T<sub>1</sub> plants as compare to wild type tomato plants grown in green house.

**Table S1.** Segregation pattern of MAX1-Cas9 mutation from T<sub>0</sub> to the T<sub>1</sub> generation. The zygosity of heterozygote in T<sub>0</sub> plant lines was putative. +, Foreign DNA (nptII) was detected; -, Foreign DNA (nptII) was not detected.

| MAX1-Cas9<br>Line | T <sub>0</sub> generation |              | T <sub>1</sub> generation                                   |                                        |                                           |
|-------------------|---------------------------|--------------|-------------------------------------------------------------|----------------------------------------|-------------------------------------------|
|                   | Mutation type             | Zygosity     | Mutation type/<br>total test                                | Mutation exists<br>no./ total test (%) | Foreign DNA<br>(nptII)<br>segregation (%) |
| Line 1            | -9nt                      | Heterozygous | homozygous<br>(5/24),<br>heterozygous<br>(12/24), wt (7/24) | 17/24 (70.8%)                          | 9+; 5- (35%)                              |

**Table S2.** Mutational analysis of off-target sites predicted to associated with MAX1-sgRNA edited lines. To analyse the off target using CRISPR-P, high score value was considered as top hit. The PAM motif (NGG) is marked by blue; mismatching bases are shown in red colour.

| <b>Name of putative off -target sites &amp; score</b> | <b>Putative off-target locus</b>                     | <b>Sequence of the Putative off-target site</b> | <b>Number of mismatching bases</b> | <b>Presence of mutation detected</b> |
|-------------------------------------------------------|------------------------------------------------------|-------------------------------------------------|------------------------------------|--------------------------------------|
| OFF1 (0.394)                                          | SL2.50ch09:+61329926<br>Solyc09g064200.2<br>(intron) | AAAATTTTCAAAAAGAATACCTGG                        | 4                                  | 0                                    |
| OFF2 (0.331)                                          | SL2.50ch01:+47873454<br>Intergenic                   | AAAGTTCTCTAAAAAATCCATGG                         | 4                                  | 0                                    |
| OFF3 (0.321)                                          | SL2.50ch08:-36699521<br>Intergenic                   | AAAGTTATCAAAAAGAATCACAGG                        | 3                                  | 0                                    |
| OFF4 (0.318)                                          | SL2.50ch04:-54647171<br>Intergenic                   | AAAATTGTCAAAA AATCCCTGG                         | 4                                  | 0                                    |

**Table S3.** List of primers used in this study

| Oligo's name       | Sequence (5' → 3')                                                | Use                                                           |
|--------------------|-------------------------------------------------------------------|---------------------------------------------------------------|
| U6R-HindIII        | TAAGCTAAGCTTCGATCTAAAAAAGCACCGACT                                 | MAX1 Exon-3 targeting sgRNA cloning in Cas9 expression vector |
| MAX1sgRNA-F        | AGAGTCGACATAGCGATTCAAGTTCTCAAAAGAA<br>TCCCGTTTTAGAGCTAGAAATAGCAAG |                                                               |
| RCSMAX1-DG-F       | CAAGTTCTCAAAAGAATCCC                                              | Diagnostic PCR and sequencing                                 |
| sgRNA-SEQ-F        | GGACACTGACGGCTTTATG                                               |                                                               |
| sgRNA-SEQ-R        | GACGAACGGATAAACCTTTTC                                             |                                                               |
| Npt-II-F           | TCTTGTCGATCAGGATGATC                                              | Transgene validation                                          |
| Npt-II-R           | AGAAGAACTCGTCAAGAAG                                               |                                                               |
| pcoCas9-F          | GATTGGCTTGATGAACTTGTAG                                            |                                                               |
| pcoCas9-R          | ATGATGATCTTGATAACCTTCTTG                                          |                                                               |
| TmMAX1-Int-F       | GAGGGAGATCTCACATTCTCTG                                            | Mutation detection and sequencing                             |
| TmMAX1-Int-R       | CCAGCAAGTGCTCATAAGTTAC                                            |                                                               |
| TmMAX1-Nest-F      | GGTGTGGATTTTGGACTTTC                                              |                                                               |
| SICCD8-qF          | CCAATTGCCTGTAATAGTTCC                                             | Real time PCR                                                 |
| SICCD8-qR          | GCCTTCAACGACGAGTTCTC                                              |                                                               |
| ABCG45-qF          | TGATTATCCAAGACCAGAGCTG                                            |                                                               |
| ABCG45-qR          | GCACCAGCAATAACAATCTCC                                             |                                                               |
| SIPDS1-qF          | TGATTATCCAAGACCAGAGCTG                                            |                                                               |
| SIPDS1-qR          | GCACCAGCAATAACAATCTCC                                             |                                                               |
| SIEF $\alpha$ 1-qF | GATTGGTGGTATTGGAAGTGC                                             |                                                               |
| SIEF $\alpha$ 1-qR | AGCTTCGTGGTGCATCTC                                                |                                                               |
| SIMAX1-qF          | GCAAGGGAGTCAGAGAAGTTAG                                            |                                                               |
| SIMAX1-qR          | GATGGCAAGCAACCAGATAGA                                             |                                                               |
| OFF9-F             | CTCCTGAAGTTTTAGATGGAAG                                            | Off target PCR and sequencing analysis                        |
| OFF9-R             | AGGCTATGTTTCAGAAAGCTAAC                                           |                                                               |
| OFF1-F             | TATTTAAGGTAAGGTAAG                                                |                                                               |
| OFF1-R             | ATTCACCATAACTGAG                                                  |                                                               |
